1     **Antibiotic resistance is lower in *Staphylococcus aureus* isolated from antibiotic-free raw**  
2                                   **meat as compared to conventional raw meat**

3  
4     **Short title: *Staph aureus* from antibiotic-free meat is more susceptible to antibiotics**

5  
6  
7  
8     #Haskell, Kyler J.,<sup>a</sup> #Schriever, Samuel R.,<sup>a</sup> Fonoimoana, Kenisi D.<sup>a</sup>, Haws, Benjamin,<sup>a</sup> Hair,  
9     Bryan B.<sup>a</sup>, Wienclaw, Trevor M.<sup>a</sup>, Holmstead, Joseph G.<sup>a</sup>, Barboza, Andrew B.<sup>a</sup>, Berges, Erik  
10                                   T.<sup>a</sup>, Heaton, Matthew J.<sup>b</sup> and \*Berges, Bradford K.<sup>a</sup>

11  
12    #These authors contributed equally to this work

13  
14    Address: Department of Microbiology and Molecular Biology, Brigham Young University,  
15    Provo, UT 84602, USA<sup>a</sup>; Department of Statistics, Brigham Young University, Provo, UT  
16                                   84602, USA<sup>b</sup>

17  
18                                   \*Correspondence to Brad Berges at Email: [brad.berges@gmail.com](mailto:brad.berges@gmail.com)

19                                   Telephone: 1-801-422-8112

20  
21    **Keywords**

22    *Staphylococcus aureus*; MRSA; Antibiotic resistance; Antibiotic abuse; Food microbiology;  
23    Livestock

## 24 **Abstract**

25 The frequent use of antibiotics contributes to antibiotic resistance in bacteria, resulting in an  
26 increase in infections that are difficult to treat. Livestock are commonly administered antibiotics  
27 in their feed, but there is current interest in raising animals that are only administered antibiotics  
28 during active infections. *Staphylococcus aureus* (SA) is a common pathogen of both humans  
29 and livestock raised for human consumption. SA has achieved high levels of antibiotic  
30 resistance, but the origins and locations of resistance selection are poorly understood. We  
31 determined the prevalence of SA and MRSA in conventional and antibiotic-free (AF) meat  
32 products, and also measured rates of antibiotic resistance in these isolates. We isolated SA from  
33 raw conventional turkey, chicken, beef, and pork samples and also from AF chicken and turkey  
34 samples. We found that SA contamination was common, with an overall prevalence of 22.64%  
35 (range of 2.78-30.77%) in conventional meats and 13.0% (range of 12.5-13.2%) in AF poultry  
36 meats. MRSA was isolated from 15.72% of conventional raw meats (range of 2.78-20.41%) but  
37 not from AF-free meats. The degree of antibiotic resistance in conventional poultry products  
38 was significantly higher vs AF poultry products for a number of different antibiotics, and while  
39 multi-drug resistant strains were relatively common in conventional meats none were detected in  
40 AF meats. The use of antibiotics in livestock contributes to high levels of antibiotic resistance in  
41 SA found in meat products. Our results support the use of AF conditions for livestock in order to  
42 prevent antibiotic resistance development in SA.

43

## 44 **Introduction**

45           The discovery of antibiotics has saved countless lives as they have been used to treat  
46 bacterial infections. However, bacteria can quickly develop resistance to antibiotics through  
47 mutation and by horizontal gene transfer [1]. Many bacterial species have acquired resistance to  
48 a number of antibiotics and the rate of development of new antibiotics is not keeping pace with  
49 the development of resistance. High rates of antibiotic use by humans, by livestock animals, and  
50 also the release of antibiotics into the environment continue to select for resistant hosts [2]. As a  
51 result, many bacterial infections are difficult to treat and future prospects are not promising that  
52 the trend will reverse.

53           Livestock animals are commonly raised in high density environments; thus infectious  
54 agents rapidly move through animals resulting in significant morbidity/mortality. These animals  
55 are commonly administered antibiotics prophylactically to prevent bacterial infections.  
56 Prophylactic use of antibiotics results in better animal survival, and also in higher meat yields.  
57 This practice is widespread around the world, and current estimates suggest that 80% of all  
58 antibiotics are administered to livestock [3]. This high rate of antibiotic use can result in the  
59 development of antibiotic resistance in livestock-associated bacterial species. Since many  
60 bacteria that infect livestock also infect humans (e.g., *E. coli*, *S. aureus*, *Salmonella*), the areas  
61 where livestock are raised are thought to be a breeding ground for antibiotic resistance [4].

62           *Staphylococcus aureus* (SA) is an opportunistic bacterial pathogen carried  
63 asymptotically by healthy individuals; it is found consistently in 20% and intermittently in  
64 60% of the human population [5]. SA can carry a number of virulence genes, including  
65 hemolysins, enterotoxins, and immune-modulatory factors [6, 7]. SA can cause a variety of

66 human diseases including skin infections, sepsis, and pneumonia [7-9]. It is also likely the most  
67 common cause of food poisoning in the United States [10].

68 Methicillin-resistant *Staphylococcus aureus* (MRSA) is a group of SA strains that has  
69 become resistant to many common antibiotics (methicillin-susceptible strains referred to as  
70 MSSA). SA and MRSA have become an increasing problem in healthcare in the United States,  
71 where they cause an estimated 80-100,000 invasive infections and 11-19,000 deaths per [11, 12].  
72 In the U.S., the Centers for Disease Control and Prevention concluded that during the year 2012,  
73 the number of MRSA-infected patients admitted into the hospital was estimated to be just above  
74 75,000 [13]. The most common mode of SA/MRSA transmission is person-to person contact,  
75 and transmission usually takes place either in hospitals or the community [14-20]. However,  
76 some individuals become infected with SA/MRSA through live animal contact, and others  
77 through contact with raw livestock meat [16-20]. These bacteria can experience horizontal gene  
78 transfer by mobile genetic elements that confer antibiotic resistance, which is thought to be the  
79 cause of the emergence of resistant bacteria found in farms and farm workers [21]. There is a  
80 link between voluntary removal of antibiotics from large-scale farms and a significant reduction  
81 in rates of antibiotic resistance among *Enterococcus* isolates from those farms [22]. These data  
82 suggest that antibiotic resistance in livestock can be reversible.

83 The aim of this study was to determine the prevalence of SA and MRSA in raw beef,  
84 chicken, pork, and turkey meats from conventionally-raised animals, and also from chicken and  
85 turkey meats from antibiotic-free (AF) raised animals, and to characterize individual antibiotic  
86 resistance profiles of the isolates. Data obtained were then analyzed to determine correlations of  
87 meat types and levels of antibiotic resistance to see if there were differences in rates of antibiotic  
88 resistance in SA isolated from meats of a particular species. We also determined if there were

89 differences in rates of antibiotic resistance in meats from animals raised with or without  
90 prophylactic antibiotic use.

91

## 92 **Materials and Methods**

### 93 **Isolation and Identification of SA/MRSA in meat samples**

94 Conventional meat samples were collected from at least 11 different grocery stores/wholesale  
95 stores/ethnic markets (see Table 2), which were obtained as packaged meats at grocery and  
96 wholesale stores and unpackaged meats from ethnic markets. AF meat samples were collected  
97 from 5 different stores, representing 6 different brands (see Table 3), all as packaged meats.  
98 Samples were tested for SA by swabbing meat with a sterile swab or pipetting 10 $\mu$ l of meat juice  
99 directly onto Mannitol Salt Agar (MSA) plates. MSA plates that showed no growth were scored  
100 as negative for SA. Growth on MSA plates, accompanied by fermentation, initially indicated SA  
101 detection. Gram stains were performed to confirm the presence of gram-positive cocci, and all  
102 isolates were also catalase and coagulase positive. Genotyping was performed by PCR to detect  
103 the presence of Staphylococcus-specific 16S rDNA sequences, and *nucA* detection was used to  
104 confirm *S. aureus* [23]. MRSA was detected by the same procedure in the presence of 2  $\mu$ g/mL  
105 oxacillin. To confirm MRSA detection, PCR was used to detect *mecA* [23]; products were  
106 separated on a 1.5% agarose gel.

### 107 **Disk Diffusion Test**

108 The disk diffusion test was used to classify the resistance of each isolate to antibiotics. We used a  
109 standard protocol [24] and used ATCC *S. aureus* reference strain 25923 as a control; if that strain  
110 failed to show established resistance values then the test was repeated. Mueller-Hinton agar  
111 plates were used for growth, supplemented with 2% NaCl. McFarland standards were used to  
112 verify that bacterial density was in the appropriate range. Amounts of antibiotic per disk were as

113 follows: clindamycin 2 µg, cefotaxime 30 µg, gentamicin 10 µg, erythromycin 15 µg,  
114 tetracycline 30 µg, ciprofloxacin 5 µg, chloramphenicol 30 µg, and rifampin 5 µg (Sigma  
115 Aldrich). Susceptibility of isolates were identified by zone diameters as determined by CLSI  
116 standards. Plates were incubated at 37°C for 24-48 hours.

## 117 **Minimum Inhibitory Concentration (MIC)**

118 MIC tests were performed for vancomycin at concentrations of 6 µg/mL (intermediate  
119 resistance) and 16 µg/mL (complete resistance). Mueller-Hinton agar plates were prepared with  
120 vancomycin, then inoculated with isolates and analyzed for growth after 24-48 hours at 37°C.  
121 MRSA was detected by the same procedure in the presence of 4 µg/mL oxacillin. Plates were  
122 observed to see if growth occurred; if only a few colonies were detected, then samples were re-  
123 tested. Presence of just a few colonies was not scored as resistant.

## 124 **Statistical analysis**

125 To analyze the prevalence of SA, MSSA, or MRSA in different types of raw meat samples, a  
126 chi-squared test was performed. A two sample t-test with unequal variance was used to  
127 determine if the sum of all meat isolates was more or less resistant/susceptible to a certain  
128 antibiotic. For all antibiotics tested with zone diameter measurements, t-tests were performed,  
129 while a 2-sample z-test of proportions was performed on oxacillin and vancomycin and also for  
130 differences in the prevalence of MDR strains. Multi-drug comparison was performed by an  
131 asymptotic chi-square test. A Fishers Exact test was used to examine differences in rates of  
132 antibiotic resistance to oxacillin and vancomycin.

## 133 Results

### 134 Detection and isolation of SA in conventional raw meat samples

135 159 different conventional meat samples (beef, chicken, pork and turkey) were tested for  
136 SA, as described in Materials and Methods. 1 of 36 beef samples was positive (2.78%), 14 of 49  
137 chicken samples were positive (28.57%), 12 of 39 pork samples were positive (30.77%), and 9 of  
138 35 turkey samples were positive (25.71%). SA contamination in beef was significantly lower  
139 than all other meat types ( $p < 0.001$ ; chi-squared test), but there were no other significant  
140 differences in prevalence. The overall frequency of SA isolation from the 159 samples was 36  
141 (22.64%; see Table 1). The meat samples were collected from at least 11 different stores, as  
142 summarized in Table 2. Information on the store of origin was not available for all 36 isolates,  
143 but the origin is reported for 20 of the 36 isolates (55.6%).

144 **Table 1: Prevalence of *Staphylococcus aureus* in Raw Meat Samples**

| Meat type  | Number of samples tested | Number of SA isolated | % with SA | Number of MSSA isolated | % with MSSA | Number of MRSA isolated | % with MRSA |
|------------|--------------------------|-----------------------|-----------|-------------------------|-------------|-------------------------|-------------|
| C Beef     | 36                       | 1                     | 2.78%     | 0                       | 0.00%       | 1                       | 2.78%       |
| C Chicken  | 49                       | 14                    | 28.57%    | 4                       | 8.16%       | 10                      | 20.41%      |
| C Pork     | 39                       | 12                    | 30.77%    | 5                       | 12.82%      | 7                       | 17.95%      |
| C Turkey   | 35                       | 9                     | 25.71%    | 2                       | 5.71%       | 7                       | 20.00%      |
| C Total    | 159                      | 36                    | 22.64%    | 11                      | 6.92%       | 25                      | 15.72%      |
| AF Chicken | 53                       | 7                     | 13.21%    | 7                       | 13.21%      | 0                       | 0%          |
| AF Turkey  | 24                       | 3                     | 12.50%    | 3                       | 12.50%      | 0                       | 0%          |
| AF Total   | 77                       | 10                    | 13.00%    | 10                      | 13.00%      | 0                       | 0%          |

145 Prevalence of *Staphylococcus aureus* (SA) in raw meat samples, which is further divided into  
146 Methicillin-Susceptible *Staphylococcus aureus* (MSSA) and Methicillin-Resistant  
147 *Staphylococcus aureus* (MRSA). C=Conventional meat sample (raised with antibiotics) and  
148 AF=Antibiotic-free meat sample.



149 **Table 2: Origin of *Staphylococcus aureus* Isolates (Conventional Meats) by Store Location**

| Store                    | Beef<br>MRSA | Chicken<br>MSSA | Chicken<br>MRSA | Pork<br>MSSA | Pork<br>MRSA | Turkey<br>MSSA | Turkey<br>MRSA | Total |
|--------------------------|--------------|-----------------|-----------------|--------------|--------------|----------------|----------------|-------|
| Grocery store A          |              |                 | 1               |              |              |                |                | 1     |
| Grocery store B          |              | 1               |                 |              |              |                |                | 1     |
| Grocery store C          |              | 1               | 1               |              |              |                |                | 2     |
| Grocery store D          |              |                 | 1               |              |              |                |                | 1     |
| Grocery store E          |              |                 |                 | 2            | 1            | 2              | 1              | 6     |
| Grocery Store F          |              |                 |                 |              | 1            |                |                | 1     |
| Wholesale store A        |              |                 | 1               |              |              |                | 1              | 2     |
| Wholesale store B        |              |                 | 2               | 1            |              |                |                | 3     |
| Small ethnic market<br>A |              |                 | 1               |              |              |                |                | 1     |
| Small ethnic market<br>B |              |                 |                 |              | 1            |                |                | 1     |
| Small ethnic market<br>C |              |                 |                 | 1            |              |                |                | 1     |
| Unknown origin*          | 1            | 2               | 3               | 1            | 4            |                | 5              | 16    |
| Total                    | 1            | 4               | 10              | 5            | 7            | 2              | 7              | 36    |

150 Store locations and specific isolates per store are listed to show that SA isolates were collected  
 151 from diverse locations. \*Some meat samples were provided without any information on the  
 152 store of origin.

### 153 **Screening of SA isolates from conventional meats for MRSA**

154 SA isolates were re-plated on MSA plates in the presence of 2 µg/ml oxacillin to  
 155 determine resistance to oxacillin. Any isolates found to be resistant to oxacillin were initially  
 156 classified as MRSA, and all others were determined to be MSSA. To confirm MRSA, PCR  
 157 genotyping was performed (data not shown) to detect the *mecA* gene; all isolates reported as  
 158 MRSA produced a band of ~533bp (see Methods). MRSA was detected only rarely in beef (1 of  
 159 36 meat samples positive; 2.78%), but was common in the other three meat types: 10 of 49 meat  
 160 samples positive in chicken (20.41%), 7 of 39 meat samples positive in pork (17.95%), and 7 of  
 161 35 meat samples positive in turkey (20.00%). The overall frequency of MRSA isolation from

162 the 159 samples was 15.72% (Table 1), consistent with reports by others in different locations  
163 [25]. Of samples where SA was detected, 100% were MRSA in beef (but n=1), 77.78% were  
164 MRSA in turkey, 71.43% were MRSA in chicken, and 58.33% were MRSA in pork. Overall,  
165 the majority of SA isolates were MRSA (69.44%). Beef had significantly fewer MSSA ( $p \leq 0.05$ )  
166 and MRSA ( $p \leq 0.02$ ) contamination as compared to other meat types, but there were no other  
167 significant differences by meat type.

### 168 **Antibiotic resistance in conventional raw meat SA isolates**

169 We next measured antibiotic resistance in all MSSA and MRSA isolates. Resistance  
170 levels were determined by disk diffusion for eight common antibiotics. Supplemental Table 1  
171 shows disk diffusion distances for each isolate, with zone diameters (in millimeters) for all  
172 antibiotics except for oxacillin and vancomycin. Relative antibiotic resistance (complete  
173 resistance, intermediate resistance, and complete susceptibility) is also indicated for each isolate.  
174 We detected two isolates with intermediate resistance to vancomycin, one of which was also a  
175 MRSA strain. Mean disk diffusion distances are shown in Figure 1 to better illustrate relative  
176 differences by meat type and by antibiotic. Of note, the frequency of isolates that were multi-  
177 drug resistant (MDR; complete resistance to three or more antibiotics) per meat group were  
178 found to be: 100% (beef; but n=1), 66.7% (chicken), 55.5% (turkey), and 54.5% (pork); the  
179 overall frequency of multi-drug resistance was 20/33 or 60.6%. No significant differences in  
180 multi-drug resistance were found by meat type; beef was excluded due to the small sample size.  
181 Complete susceptibility to all antibiotics tested was not detected in any isolate.

182 We then determined if there were any significant differences in rates of antibiotic  
183 resistance when comparing meat types. The only significant result was that pork SA isolates  
184 were significantly more susceptible to cefotaxime as compared to other SA isolates ( $p=0.03$  for

185 susceptibility, or  $p=0.97$  for resistance). We compared rates of antibiotic resistance amongst all  
186 SA samples to determine if SA from raw meat samples showed significant differences in  
187 antibiotic susceptibility across the 10 antibiotics tested (Fig. 1). Clindamycin resistance was  
188 significantly higher than rifampin ( $p=0.005$ ); tetracycline resistance was significantly higher than  
189 rifampin ( $p<0.001$ ) and ciprofloxacin ( $p=0.003$ ); cefotaxime resistance was significantly higher  
190 than rifampin ( $p<0.001$ ) and ciprofloxacin ( $p=0.011$ ); erythromycin resistance was significantly  
191 higher than all other antibiotics ( $p\leq 0.05$ ); chloramphenicol resistance was significantly higher  
192 than rifampin ( $p<0.001$ ) and ciprofloxacin ( $p=0.002$ ); gentamicin resistance was significantly  
193 higher than rifampin ( $p<0.001$ ) and ciprofloxacin ( $p=0.035$ ); and ciprofloxacin resistance was  
194 significantly higher than rifampin ( $p=0.001$ ).

## 195 **Detection and isolation of SA and MRSA in AF raw poultry samples**

196 Raw meat samples were tested for the presence of SA using the same methods outlined  
197 above, but using raw meat samples marked as “antibiotic-free”. In total, 77 different raw poultry  
198 meat samples (chicken and turkey) were tested. AF meat sources are shown in Table 3. 7 of 53  
199 chicken samples were positive for SA (13.2%) and 3 of 24 turkey samples were positive (12.5%)  
200 for SA. SA was found at significantly higher levels in conventional meats as compared to AF  
201 meats for chicken ( $p=0.03$ ), but not for turkey ( $p=0.11$ ). Isolates were genotyped as above to  
202 confirm SA and MRSA. None of the 10 isolates from AF poultry meats were positive for the  
203 *mecA* gene, indicating a lack of MRSA amongst all AF poultry isolates. These results were  
204 further confirmed by a lack of growth on MSA plates with 2  $\mu\text{g/ml}$  oxacillin. MRSA was found  
205 at significantly higher levels in conventional meats as compared to AF meats for both chicken  
206 ( $p=0.0004$ ) and turkey ( $p=0.0002$ ).

207

208 **Table 3: Origin of *Staphylococcus aureus* Isolates (Antibiotic-free meats) by Store Location**

209

| 210 | Store                    | Chicken<br>MSSA | Chicken<br>MRSA | Turkey<br>MSSA | Turkey<br>MRSA | Total |
|-----|--------------------------|-----------------|-----------------|----------------|----------------|-------|
|     | Grocery store A, Brand 1 | 2               | 0               | 2              | 0              | 4     |
| 211 | Grocery store B, Brand 1 | 5               | 0               | 1              | 0              | 6     |
|     | Grocery store C, Brand 1 | 0               | 0               | 0              | 0              | 0     |
|     | Grocery store D, Brand 1 | 0               | 0               | 0              | 0              | 0     |
| 212 | Grocery store E, Brand 1 | 0               | 0               | 0              | 0              | 0     |
|     | Grocery store E, Brand 2 | 0               | 0               | 0              | 0              | 0     |
| 213 | Total                    | 7               | 0               | 3              | 0              | 0     |

214 Store locations and specific isolates per store are listed to show that SA isolates were collected  
215 from diverse locations.

216

### 217 **Antibiotic resistance in AF poultry SA isolates**

218 We next measured antibiotic resistance in all SA isolates from AF meats, as above for  
219 conventional meat SA isolates. Supplemental Table 2 shows disk diffusion distances for each  
220 isolate, with zone diameters (in millimeters) for all antibiotics except for oxacillin and  
221 vancomycin; relative rates of antibiotic resistance are also indicated for each isolate. Mean disk  
222 diffusion distances are shown in Figure 2. We did not detect any MDR isolates in the AF meat  
223 samples. Complete susceptibility to all antibiotics tested was detected in one chicken SA isolate.  
224 All AF SA isolates were susceptible to chloramphenicol, oxacillin, and vancomycin.

225 Statistical analysis was then performed to determine if there were any significant  
226 differences in antibiotic resistance when comparing AF poultry meat types. Most antibiotic  
227 resistances were not significantly different when comparing SA from chicken or turkey, with the  
228 exception being that SA from chicken was significantly more resistant to ciprofloxacin

229 (p=0.005). Chicken isolates approached significantly higher resistance to cefotaxime (p=0.07),  
230 and turkey isolates approached significantly higher resistance to erythromycin (p=0.07); a larger  
231 sample size for AF turkey isolates might yield significant results for those groups.

232           Statistical analysis was also performed to determine if there were any significant  
233 differences in antibiotic resistance when comparing conventional to AF meat sources (Figure 3).  
234 We found significantly lower rates of resistance ( $p \leq 0.05$ ) to the following antibiotics in AF  
235 chicken products: clindamycin, cefotaxime, erythromycin, chloramphenicol, and oxacillin (Fig.  
236 3A). In addition, there was a highly significant difference (p=0.0003) in MDR strains, with none  
237 detected in AF chicken meat products. We found significantly lower rates of resistance ( $p \leq 0.05$ )  
238 to the following antibiotics in AF turkey products: cefotaxime, chloramphenicol, ciprofloxacin,  
239 and oxacillin (Fig. 3B). There was a significant difference (p=0.0067) in MDR strains, with  
240 none detected in AF turkey meat products.

241

## 242 **Discussion**

243           We isolated 36 *Staphylococcus aureus* (SA) strains from conventional raw meat products  
244 and 10 SA strains from AF meat products. SA was common in conventional raw meat products,  
245 with a combined prevalence of 22.6% amongst the four meat types. Beef contamination was  
246 significantly lower than other meat types, but no significant differences were seen between non-  
247 beef frequencies. MRSA isolates were also common in conventional meat products, with an  
248 overall prevalence of 15.7%, but there were no significant differences in either MRSA or MSSA  
249 detection with the exception that beef had significantly lower contamination with both types. SA  
250 contamination of AF poultry meats was significantly lower than in conventional meats (13.0% vs  
251 22.6%;  $p=0.02$ ), and no MRSA was detected in the 77 AF poultry samples (0%;  $p<0.001$ ). We  
252 also determined the antibiotic resistance profiles of each isolate for ten common antibiotics.  
253 Antibiotic resistance in SA was very common amongst conventional meat isolates, but less  
254 common in AF meat isolates. 20 conventional meat isolates showed resistance to at least three  
255 different antibiotics (60.6% of the isolates); while no isolates were multi-drug resistant in the AF  
256 group.

257           The prevalence of SA detected in our conventional meat samples was remarkably  
258 consistent amongst chicken, pork and turkey (range of 25.71-30.77%). We detected more  
259 MRSA than MSSA in raw meat samples (Table 1), and that trend held true across all meat types.  
260 Our MRSA detection was higher than reported in other areas of the USA, especially for MRSA  
261 in poultry, but were lower than those reported for pork in Canada [26]. Our AF meats had a  
262 significantly lower SA prevalence than for conventional meats. The reasons for this finding are  
263 not clear, but since SA has high rates of antibiotic resistance it is possible that this species can

264 outcompete other species when antibiotics are present, but when they are not it is outcompeted  
265 by other bacteria due to higher fitness in other areas.

266           It is possible that contamination of meat products at central processing locations could  
267 explain our results. Our isolates were obtained from at least 11 different stores, and the  
268 antibiotic resistance profiles shown provide evidence that we did not re-isolate the same strains  
269 repeatedly because the drug resistance patterns amongst the various isolates match only rarely  
270 (Suppl. Tables 1 and 2). Taken together, this analysis indicates that many independent SA  
271 strains were isolated during these studies, suggesting that a common source of SA contamination  
272 at a processing plant is less likely to have affected our results. This further supports the  
273 hypothesis that SA and MRSA isolates obtained from raw consumer meats include a variety of  
274 SA strains with different resistance profiles, which could contribute to eventual increased  
275 resistance in strains that could become a concern to consumers due to potential mobile genetic  
276 elements.

277           The United States Food and Drug Administration releases results of the total amounts of  
278 antibiotics sold for use in food-producing animals, and the 2014 report showed an increase of  
279 22% in sales from 2009 to 2014. Tetracycline accounted for 70% of sales, followed by penicillin  
280 (9%), macrolides (7%), and sulfas (5%) with no other drugs over 3% [27]. We have shown that  
281 tetracycline resistance is significantly higher in SA isolates from conventional meats than that  
282 seen for rifampin or ciprofloxacin, but not for other the antibiotics tested (Figure 1), although  
283 there was no significant difference. High levels of antibiotic usage in livestock can also be seen  
284 on a worldwide scale; in 2014 it was estimated that 38.5 million kilograms of antibiotics were  
285 used exclusively in swine and poultry in China [28] and it is estimated that worldwide antibiotic  
286 usage will increase 67% from 2010 to 2030 due to growing demand for meat [29].

287           A handful of studies have analyzed the frequency of SA and MRSA in meats produced  
288 from animals raised under AF conditions. A study of AF vs conventional chicken products in  
289 Oklahoma, USA found a lower prevalence of SA contamination in AF meats vs. conventional  
290 meats (41% vs 53.8%) but the difference was not significant. MRSA contamination was very  
291 low in both types of chicken [30]. SA was somewhat less common in AF pork (56.8%) as  
292 compared to conventional pork (67.3%), although the difference was not significant. MRSA  
293 frequency in raw pork was very similar in conventional pork (6.3%) and AF pork (7.4%) [31].  
294 *E. coli* antibiotic resistance in organic vs conventionally-raised pigs in four European countries  
295 was found to be lower for a number of different antibiotics tested [32], and analysis of  
296 antimicrobial resistance genes across the microbiome of AF vs conventional chickens found that  
297 AF animals also had lower levels of antibiotic resistance genes in their associated bacteria [33].  
298 These results indicate that the lower rates of antibiotic resistance in AF animals likely apply to  
299 other bacterial species and not just for SA. A poultry farm in the USA transitioned from  
300 common antibiotic use to organic practices, and two *Enterococcus* species were analyzed for  
301 antibiotic resistance before and after the transition. Interestingly, antibiotic resistance levels  
302 significantly decreased following the transition [22].

303

## 304 **Conclusions**

305           In conclusion, we have found that the use of antibiotics in livestock contributes to high  
306 levels of antibiotic resistance in SA isolates found in their resulting meat products. Our results  
307 suggest that the use of antibiotics in livestock promotes higher rates of antibiotic resistance in  
308 bacteria found in the meat products that consumers come into contact with and could be a source  
309 of transmission of antibiotic resistance bacteria to humans. AF conditions for livestock may



- 310 prevent antibiotic resistance development in SA and in other microbes, and could relieve the
- 311 continued development of antibiotic resistance.

## 312 **List of Abbreviations**

313 SA: *Staphylococcus aureus*; MSSA: Methicillin-susceptible *Staphylococcus aureus*; MRSA:  
314 Methicillin-resistant *Staphylococcus aureus*; LA: livestock-associated.

315

## 316 **Acknowledgements**

317 We thank Kyle Jensen, Taalin Rasmussen, Kelsey Berges, and Chloe McCullough for help in  
318 collecting meat samples.

319

## 320 **Figure Legends**

321

### 322 **Figure 1: Mean antibiotic resistance in conventional raw meat SA isolates for eight** 323 **common antibiotics.**

324 Disk diffusion tests were performed to determine the amount of antibiotic required to prevent  
325 growth of the various SA raw meat isolates. There was only a single SA isolate from beef, and  
326 thus no results are reported here for that meat type. Means were calculated and standard error is  
327 indicated. Antibiotic concentrations used and significance of zone diameters are detailed in  
328 Methods. A two sample t-test with unequal variance test was used to determine if there were  
329 significant differences in rates of antibiotic resistance or susceptibility amongst the various meat  
330 types.

331

### 332 **Figure 2: Mean antibiotic resistance in AF raw poultry SA isolates for eight common** 333 **antibiotics.**

334 Disk diffusion tests were performed to determine the amount of antibiotic required to prevent  
335 growth of the various SA raw meat isolates. A two sample t-test with unequal variance test was  
336 used to determine if there were significant differences in rates of antibiotic resistance or  
337 susceptibility amongst the various meat types. \* indicates  $p \leq 0.05$ .

338

### 339 **Figure 3: Antibiotic resistance levels in AF meat products as compared to conventional** 340 **meat products.** Panel A shows differences in antibiotic resistance in SA isolated from AF

341 chicken products (n=7) as compared to conventional chicken products (n=12) and panel B shows  
342 differences in rates of antibiotic resistance in SA isolated from AF turkey products (n=3) as

343 compared to conventional turkey products (n=9). A 2-sample z-test on proportions was used to  
344 determine if there were significant differences in rates of antibiotic resistance amongst the  
345 various meat types for all antibiotics tested by disk diffusion. A Fishers Exact test was used to  
346 examine significant differences in oxacillin and vancomycin resistance. \* indicates  $p \leq 0.05$ ; \*\*  
347 indicates  $p \leq 0.01$ .  
348

349 **Funding**

350 This research was supported by a Brigham Young University Mentoring Environment Grant and  
351 a Turkey Research Grant to BKB, and a Brigham Young University Office of Research and  
352 Creative Activities Grant to BBH.

353

## 354 References

- 355 1. Davies J, Davies D. Origins and evolution of antibiotic resistance. *Microbiol Mol Biol Rev.*  
356 2010;74:417-33.
- 357 2. Levy SB, Marshall B. Antibacterial resistance worldwide: causes, challenges and responses. *Nat*  
358 *Med.* 2004;10 (Suppl):S122-S9.
- 359 3. Ventola CL. The Antibiotic Resistance Crisis. Part 1: Causes and Threats. *Pharmacy and*  
360 *Therapeutics.* 2015;40:277-83.
- 361 4. Barza M, Gorbach SL. The need to improve antimicrobial use in agriculture: ecological and  
362 human health consequences. *Clin Infect Dis.* 2002;34:S71-S144.
- 363 5. Von Eiff C, Becker K, Machka K, Stammer H, Peters G. Nasal carriage as a source of  
364 *Staphylococcus aureus* bacteremia. *New England Journal of Medicine.* 2001;344:11-6.
- 365 6. Oogai Y, Matsuo M, Hashimoto M, Kato F, Sugai M, Komatsuzawa H. Expression of virulence  
366 factors by *Staphylococcus aureus* grown in serum. *Applied and environmental microbiology.*  
367 2011;77:8097-105.
- 368 7. Bien J, Sokolova O, Bozko P. Characterization of virulence factors of *Staphylococcus aureus*:  
369 novel function of known virulence factors that are implicated in activation of airway epithelial  
370 proinflammatory response. *Journal Pathog.* 2011;2011:601905.
- 371 8. David MZ, Daum RS. Community-associated methicillin-resistant *Staphylococcus aureus*:  
372 epidemiology and clinical consequences of an emerging epidemic. *Clinical microbiology reviews.*  
373 2010;23:616-87.
- 374 9. Cogen AL, Nizet V, Gallo RL. Skin microbiota: a source of disease or defence? *British Journal of*  
375 *Dermatology.* 2008;158:442-55.
- 376 10. Kluytmans JA. Methicillin-resistant *Staphylococcus aureus* in food products: cause for concern or  
377 case for complacency? *Clin Microbiol Infect.* 2010;16:11-5.
- 378 11. Boucher HW, Corey GR. Epidemiology of methicillin-resistant *Staphylococcus aureus*. *Clin Infect*  
379 *Dis.* 2008;46:S344-9.
- 380 12. Klein E, Smith DL, Laxminarayan R. Hospitalizations and deaths caused by methicillin-resistant  
381 *Staphylococcus aureus*, United States, 1999-2005. *Emerg Infect Dis.* 2007;13:1840-6.
- 382 13. Prevention CfDca. Active Bacterial Core Surveillance Report, Emerging Infections Program  
383 Network, Methicillin - Resistant *Staphylococcus aureus* 2012 [updated 2012]. Available from:  
384 <http://www.cdc.gov/abcs/reports-findings/survreports/mrsa12.pdf>.
- 385 14. van Rijen MM, Bosch T, Heck ME, Kluytmans JA. Methicillin-resistant *Staphylococcus aureus*  
386 epidemiology and transmission in a Dutch hospital. *J Hosp Infect.* 2009;72:299-306.
- 387 15. Hughes C, Tunney M, Bradley MC. Infection control strategies for preventing the transmission of  
388 methicillin-resistant *Staphylococcus aureus* (MRSA) in nursing homes for older people. *Cochrane*  
389 *Database Syst Rev.* 2013;11:CD006354.
- 390 16. Juhász-Kaszanyitzky É, Jánosi S, Somogyi P, Dán Á, vanderGraaf van Bloois L, Van Duijkeren E, et  
391 al. MRSA transmission between cows and humans. *Emerg infect dis.* 2007;13:630-2.
- 392 17. Graveland H, Wagenaar JA, Heesterbeek H, Mevius D, Van Duijkeren E, Heederik D. Methicillin  
393 resistant *Staphylococcus aureus* ST398 in veal calf farming: human MRSA carriage related with animal  
394 antimicrobial usage and farm hygiene. *PLoS ONE.* 2010;5:e10990.
- 395 18. Lee JH. Methicillin (oxacillin)-resistant *Staphylococcus aureus* strains isolated from major food  
396 animals and their potential transmission to humans. *Appl Environ Microbiol.* 2003;69:6489-94.
- 397 19. van Duijkeren E, Ikawaty R, Broekhuizen-Stins MJ, Jansen MD, Spalburg EC, de Neeling AJ, et al.  
398 Transmission of methicillin-resistant *Staphylococcus aureus* strains between different kinds of pig farms.  
399 *Vet microbiol.* 2008;126:383-9.

- 400 20. Armand-Lefevre L, Ruimy R, Andremont A. Clonal comparison of *Staphylococcus aureus* isolates  
401 from healthy pig farmers, human controls, and pigs. *Emerg Infect Dis*. 2005;11(7):711-714.
- 402 21. Lindsay JA. *Staphylococcus aureus* genomics and the impact of horizontal gene transfer. *Int J*  
403 *Med Microbiol*. 2014;304(2):103-9. Epub 1 December 2013. doi: 10.1016/j.ijmm.2013.11.010. PubMed  
404 PMID: 24439196.
- 405 22. Sapkota AR, Hulet RM, Zhang G, McDermott P, Kinney EL, Schwab KJ, et al. Lower prevalence of  
406 antibiotic-resistant Enterococci on U.S. conventional poultry farms that transitioned to organic practices.  
407 *Environ Health Perspect*. 2011;119:1622-8.
- 408 23. Maes N, Magdalena J, Rottiers S, De Gheldre Y, Struelens MJ. Evaluation of a triplex PCR assay to  
409 discriminate *Staphylococcus aureus* from coagulase-negative Staphylococci and determine methicillin  
410 resistance from blood cultures. *J Clin Microbiol*. 2002;40:1514-7.
- 411 24. CLSI. Performance Standards for Antimicrobial Susceptibility Testing; Twenty-Third  
412 Informational Supplement. CLSI document M11-S23. Wayne, PA: Clinical and Laboratory Standards  
413 Institute. 2013.
- 414 25. Jackson CR, Davis JA, Barrett JB. Prevalence and characterization of methicillin-resistant  
415 *Staphylococcus aureus* isolates from retail meat and humans in Georgia. *J Clin Microbiol*.  
416 2013;51(4):1199-207. Epub 30 January 2013. doi: 10.1128/JCM.03166-12. PubMed PMID: 23363837;  
417 PubMed Central PMCID: PMC3666775.
- 418 26. Weese JS, Reid-Smith R, Rousseau J, Avery B. Methicillin-resistant *Staphylococcus aureus*  
419 (MRSA) contamination of retail pork. *Can Vet J*. 2010;51:749-52.
- 420 27. 2014 Summary Report on Antimicrobials Sold or Distributed for Use in Food-Producing Animals.  
421 In: Services HaH, editor. 2015.
- 422 28. Krishnasamy V, Otte J, Silbergeld E. Antimicrobial use in Chinese swine and broiler poultry  
423 production. *Antimicrob Resist Infect Control*. 2015;4(17):17. Epub 28 April 2015. doi: 10.1186/s13756-  
424 015-0050-y. PubMed PMID: 25922664; PubMed Central PMCID: PMC4412119.
- 425 29. Van Boeckel TP, Brower C, Gilbert M, Grenfell BT, Levin SA, Robinson TP, et al. Global trends in  
426 antimicrobial use in food animals. *P Natl Acad Sci USA*. 2015;112(18):5649-54. doi:  
427 10.1073/pnas.1503141112. PubMed PMID: WOS:000353953800045.
- 428 30. Abdalrahman LS, Stanley A, Wells H, Fakhr MK. Isolation, Virulence, and Antimicrobial  
429 Resistance of Methicillin-Resistant *Staphylococcus aureus* (MRSA) and Methicillin Sensitive  
430 *Staphylococcus aureus* (MSSA) Strains from Oklahoma Retail Poultry Meats. *Int J Environ Res Public*  
431 *Health*. 2015;12:6148-61.
- 432 31. O'Brien AM, Hanson BM, Farina SA, Wu JY, Simmering JE, Wardyn SE, et al. MRSA in  
433 conventional and alternative retail pork products. *PLoS One*. 2012;7:e30092.
- 434 32. Österberg J, Wingstrand A, Nygaard Jensen A, Kerouanton A, Cibin V, Barco L, et al. Antibiotic  
435 Resistance in *Escherichia coli* from Pigs in Organic and Conventional Farming in Four European  
436 Countries. *PLoS One*. 2016;11:e0157049.
- 437 33. Hegde NV, Kariyawasam S, DebRoy C. Comparison of antimicrobial resistant genes in chicken gut  
438 microbiome grown on organic and conventional diet. *Veterinary and Animal Science*. 2016;1:9-14.

439

440

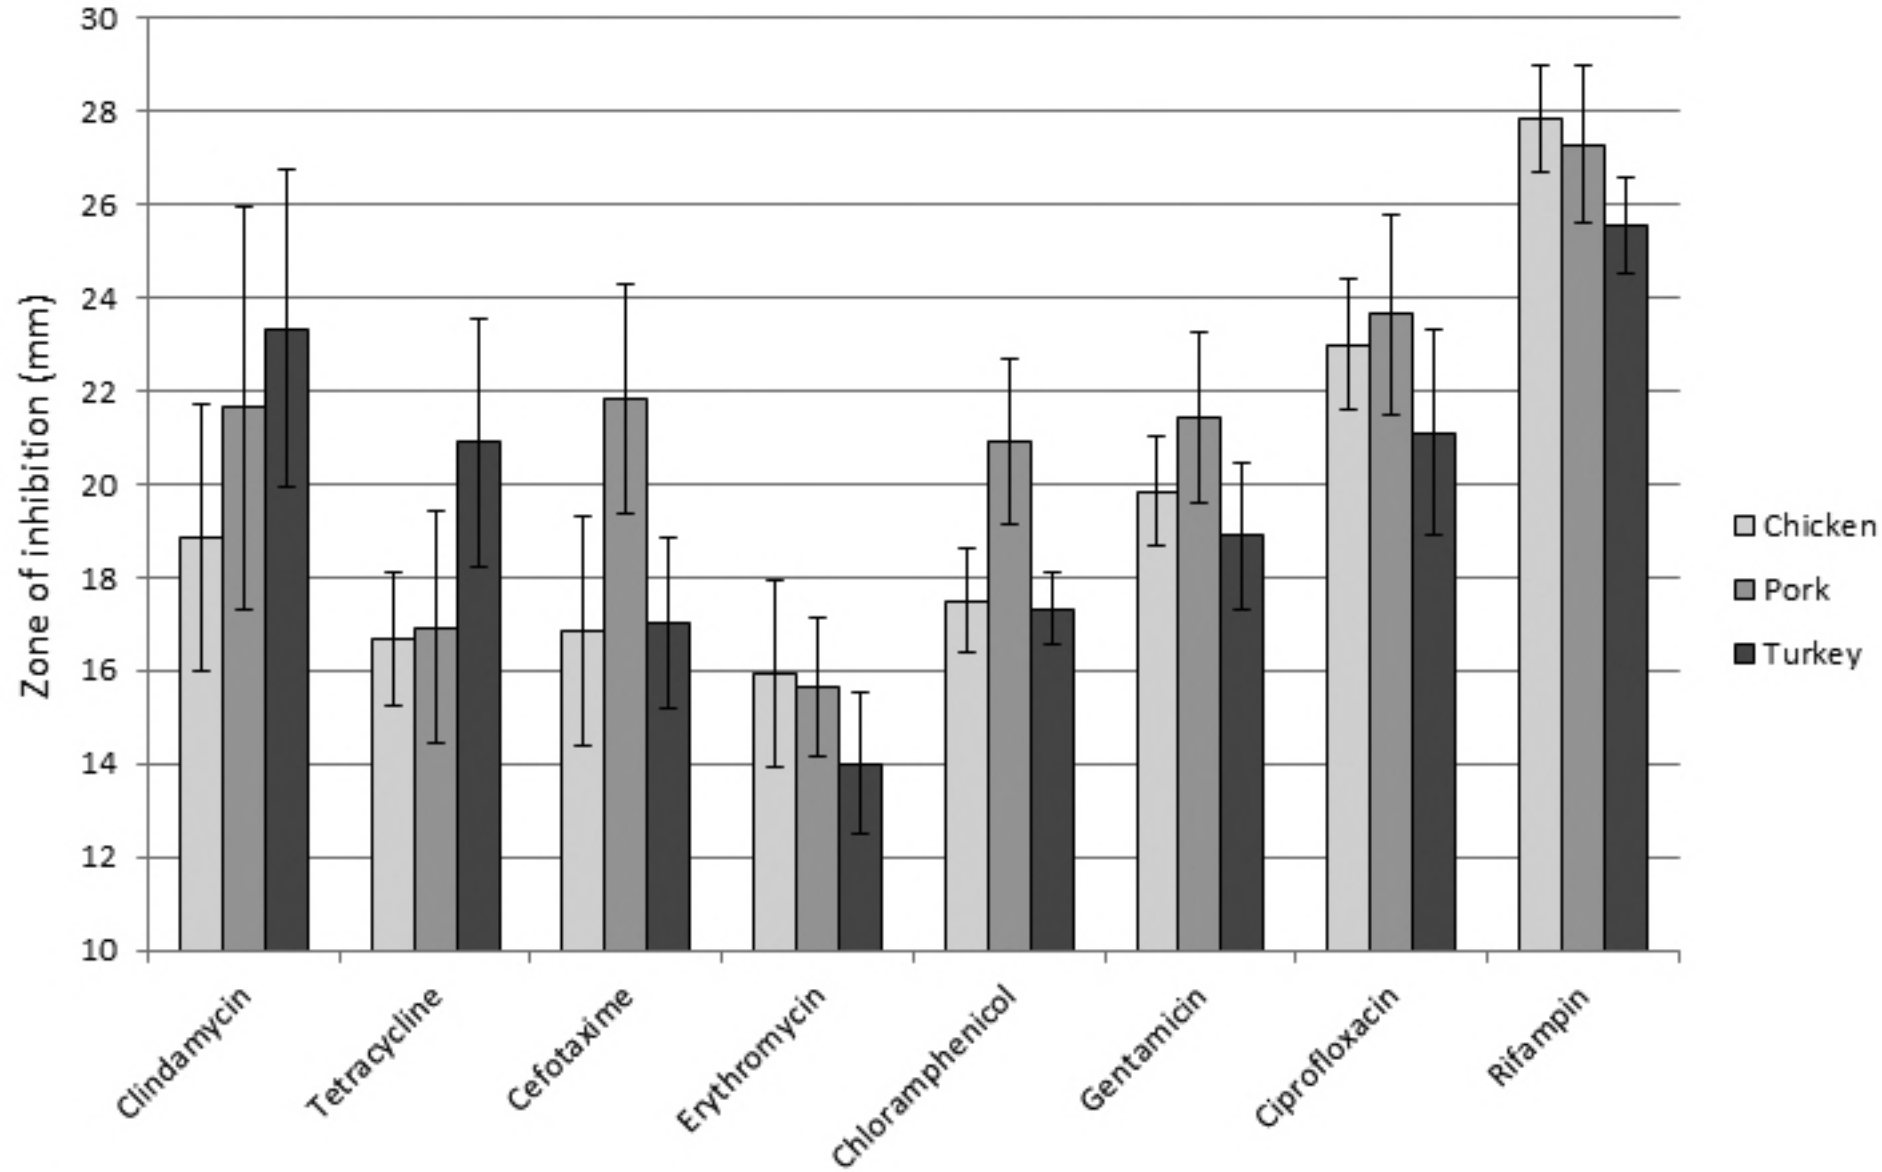

Figure 1



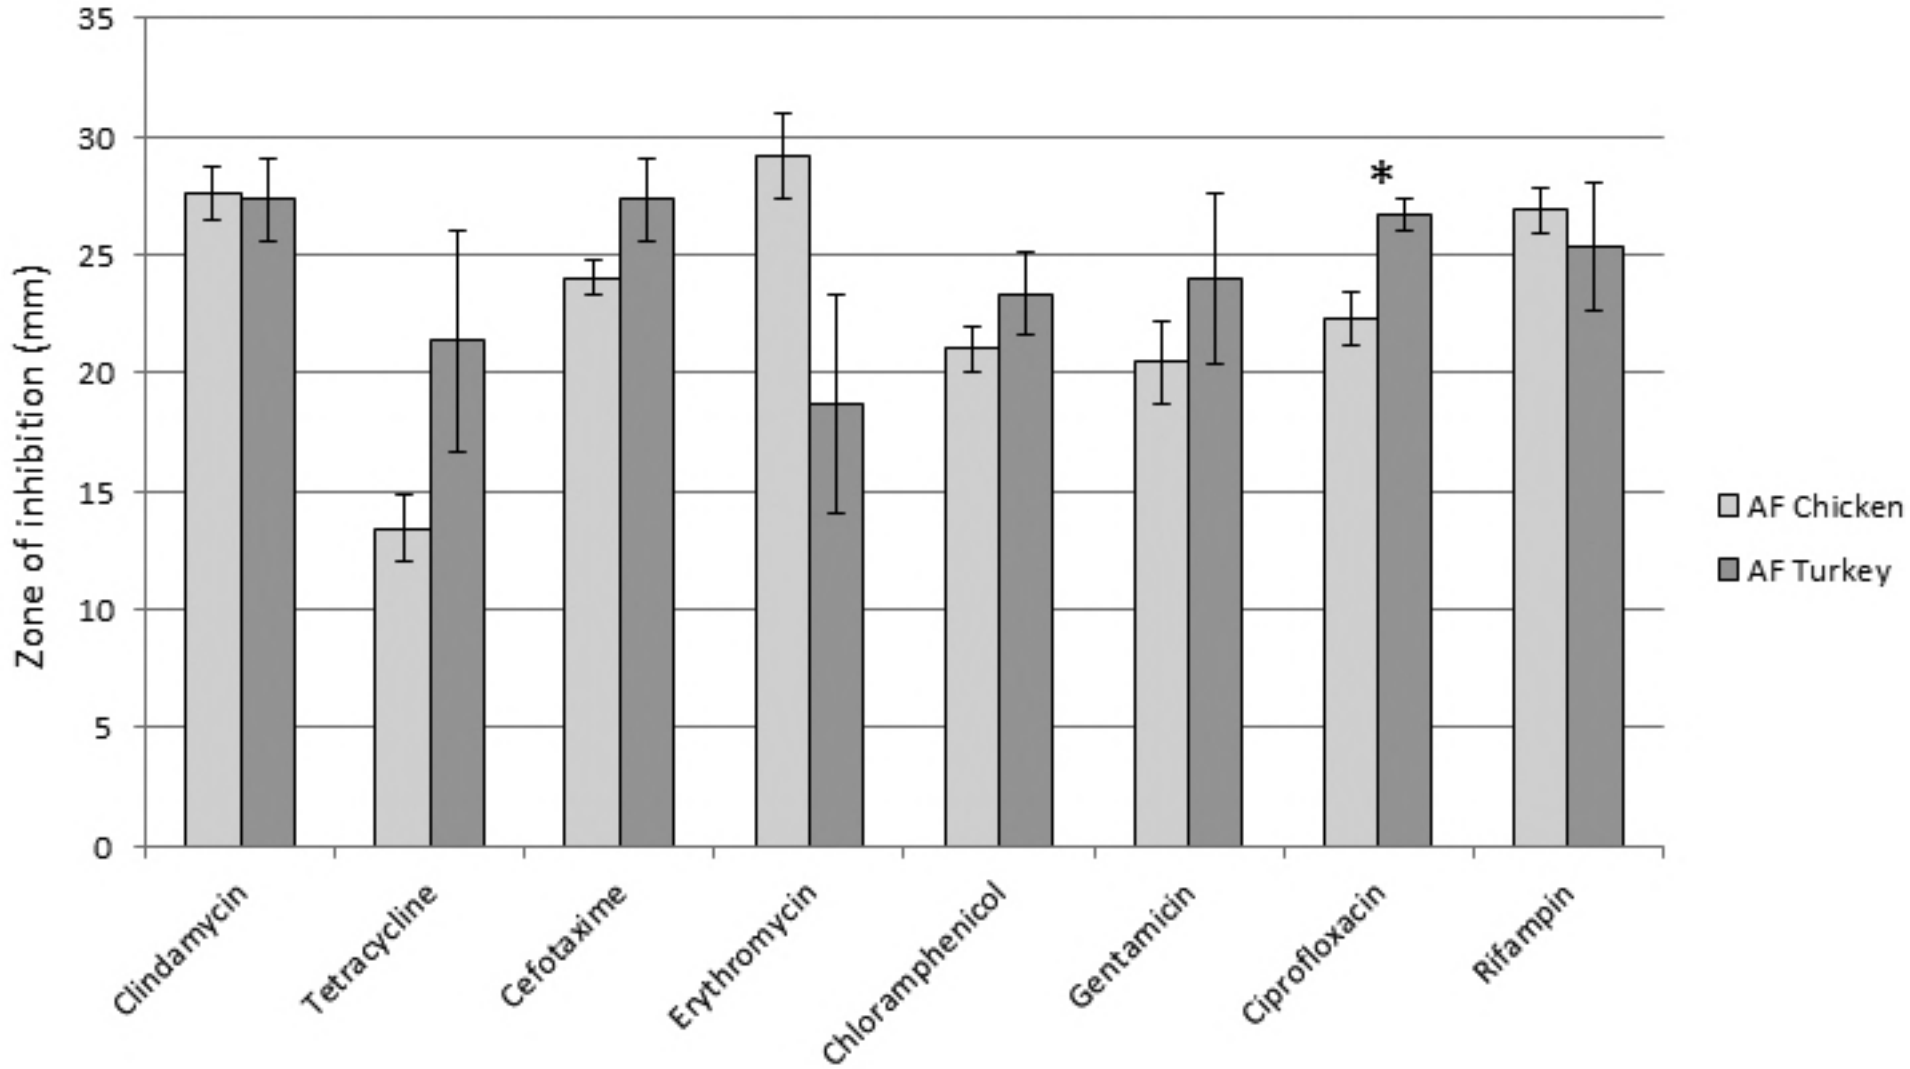

Figure 2

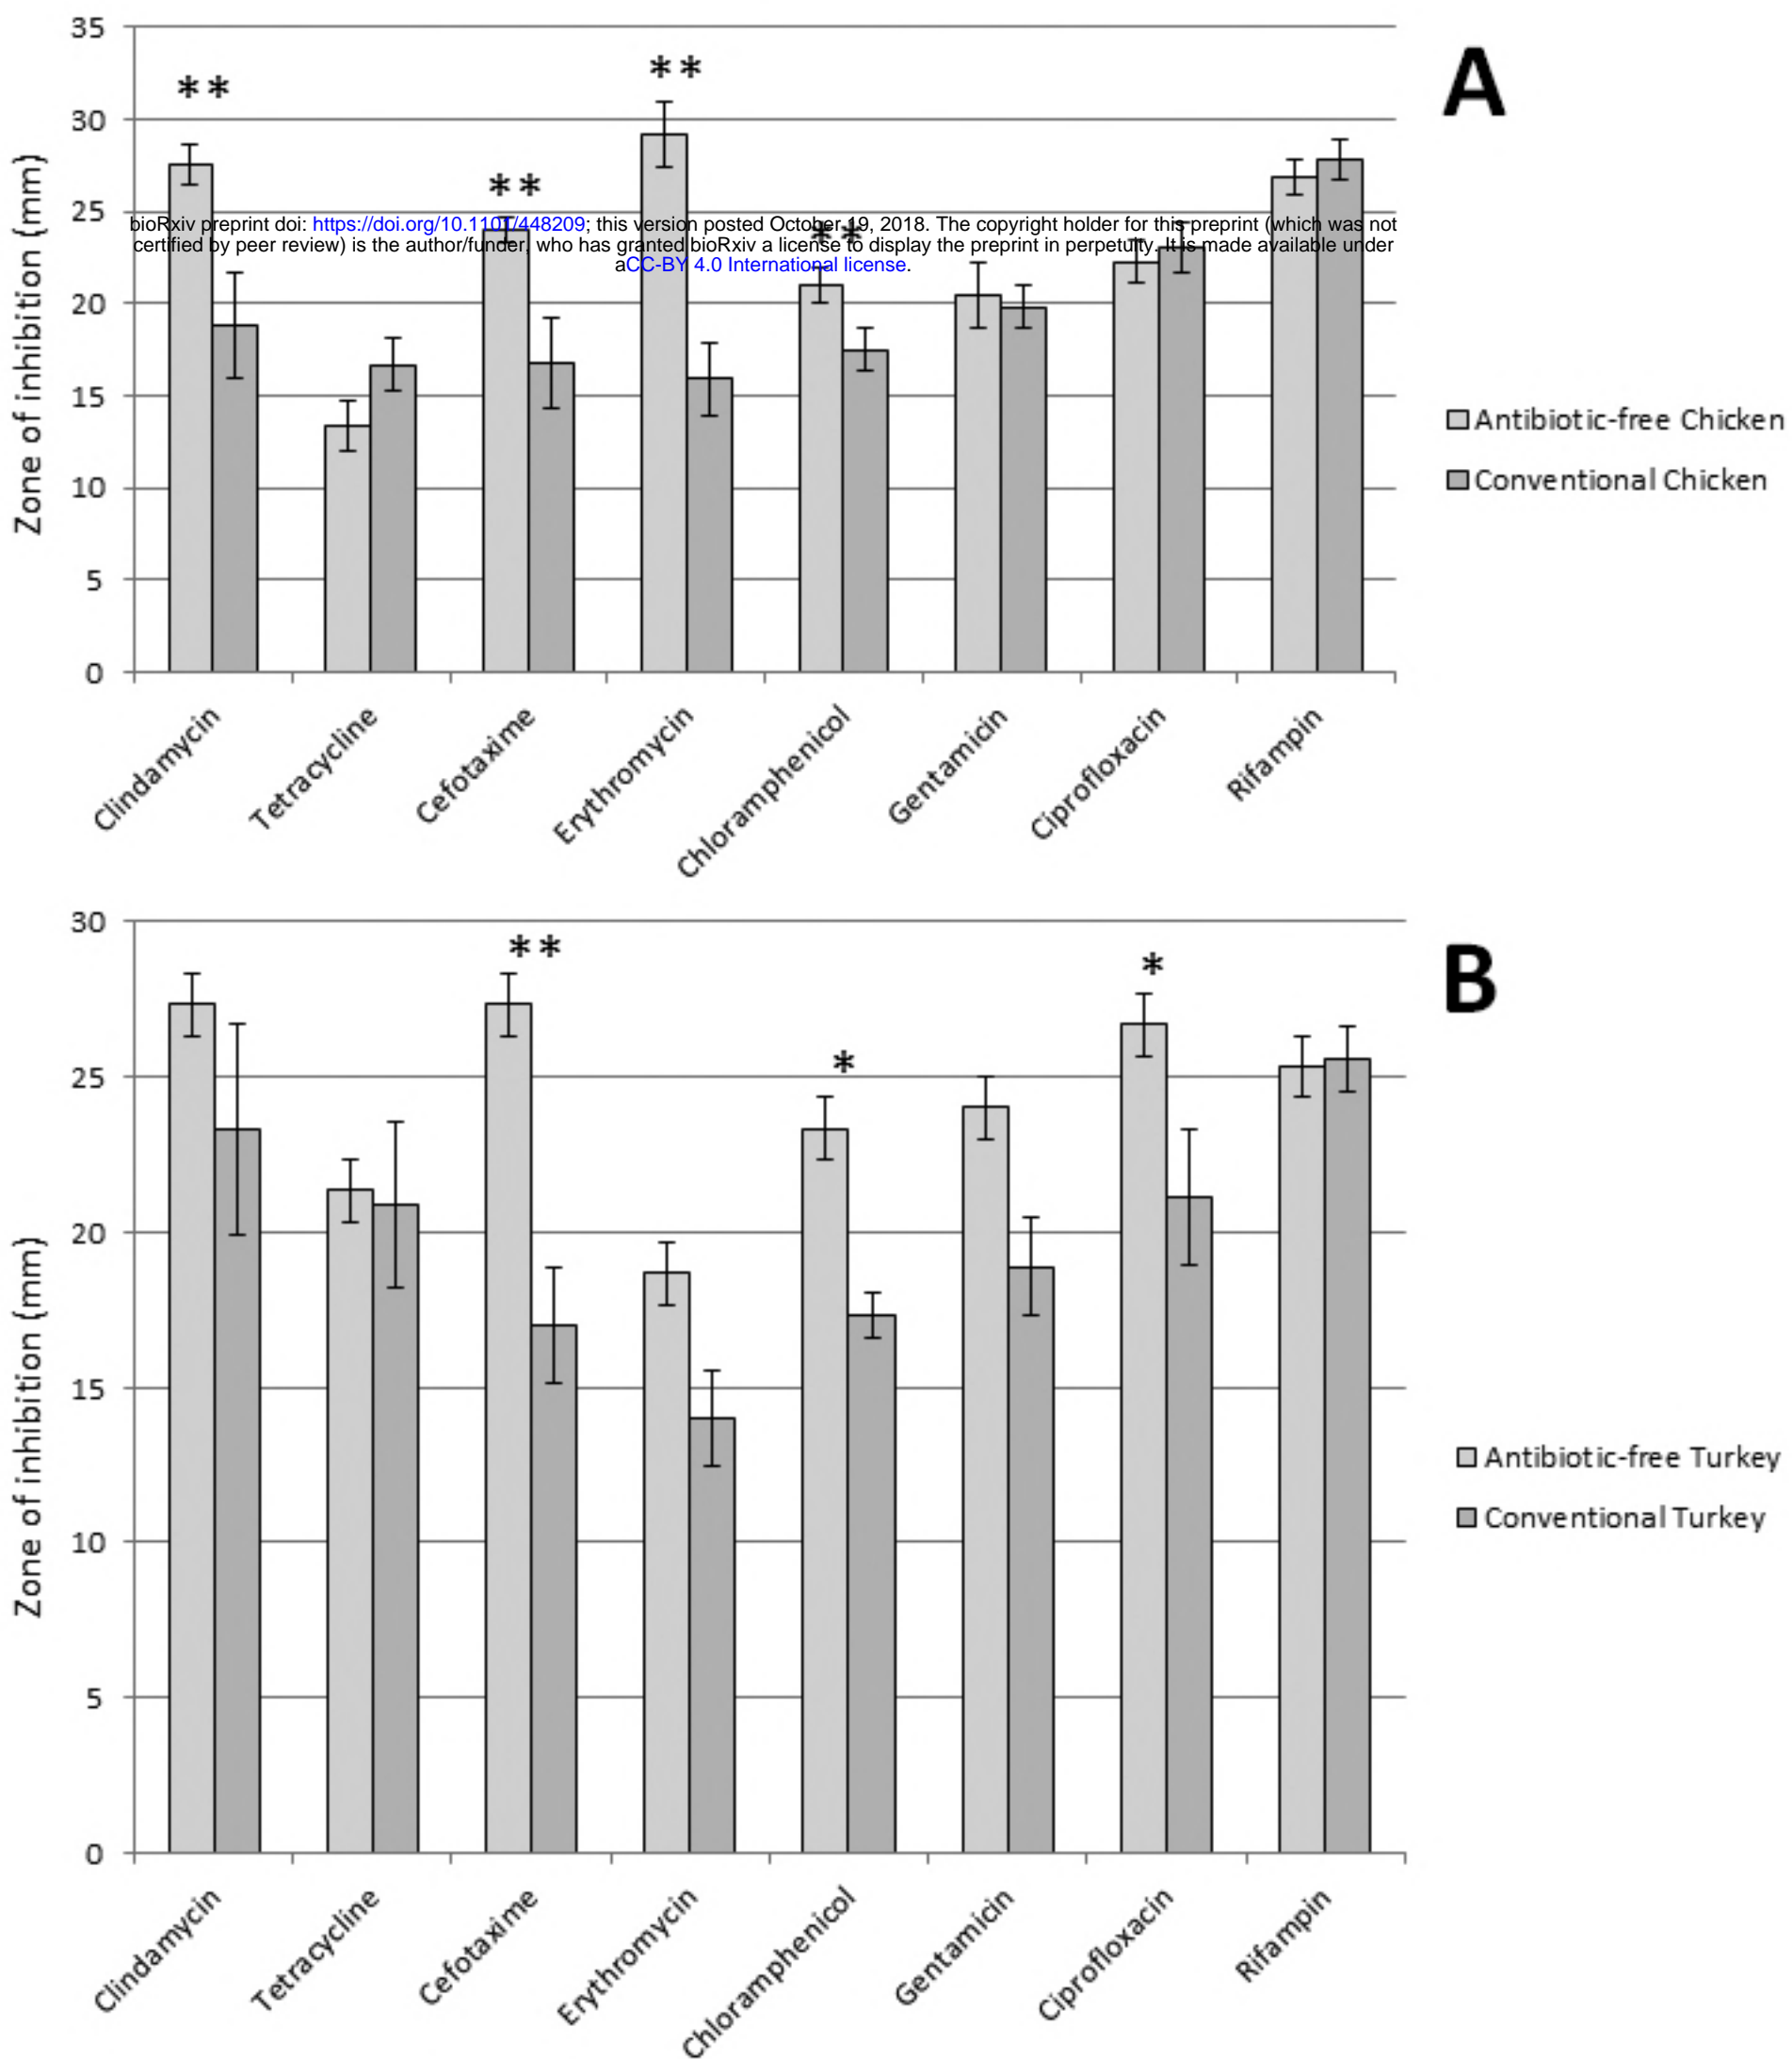

Figure 3
